# Supplementary material
Source: Springer Nature journal article supplement (https://www.springermedizin.de/resource/supplementary/12879_2002_55_MOESM3_ESM.pdf/9448058)

**A****V3 loop amino acid sequence****tropism**

**NL4-3**      SANFTDNAKTIIDQLNTSVEINCTRPNNNTRKSIRIQRGPGRFAVFTIGKI-GNMRQAHCNISRAKWNATLKQIAS

**X4**

**PI-952**      SANFCDNAKTIIVQLNETIKINCTRPNNNTRKRITL--GPGRVLYTTGEEIGDIRKAHCNISREKWNNTLYQVAS

**R5X4**

**PI-991**      SENFTNNAKTIIVQLNESVVINCTRPNNNTRRSIPI--GPGRAFYTGTGDIVGDIRQAHCNISRAQWNNTLEQVAS

**R5**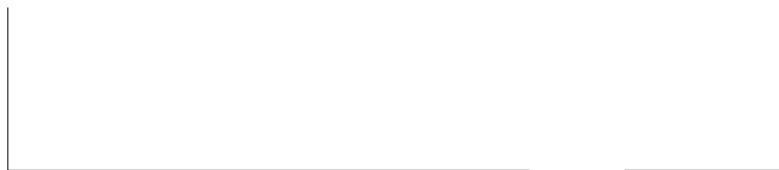**B**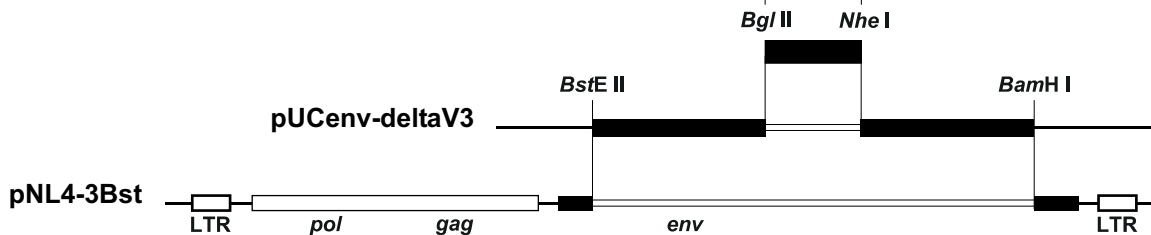**C**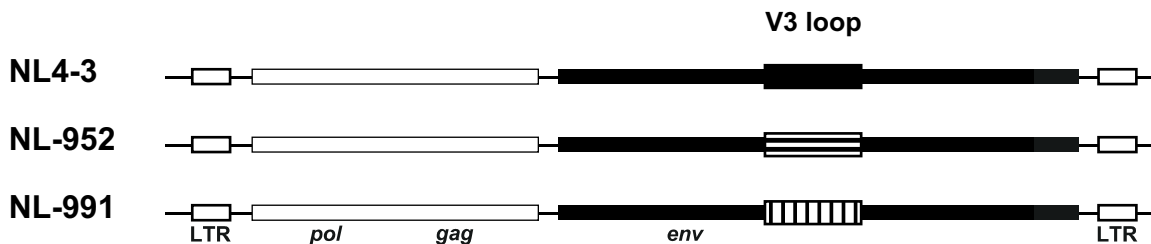

Supplement: MOESM3 [file 9448058]
